# Supplementary material for: Benznidazole Biotransformation and Multiple Targets in Trypanosoma cruzi Revealed by Metabolomics
Source: PLoS Negl Trop Dis. 2014 May 22;8(5):e2844. doi: 10.1371/journal.pntd.0002844 (PMC4031082; doi:10.1371/journal.pntd.0002844)
Supplement: File S3 — File showing data from Bzn metabolites collected from raw files. (XLSX) [file pntd.0002844.s004.xlsx]

## Sheet: raw data
*Expected m/z values are displayed. Observed values are within 3 ppm.
Raw data Bzn 20 µM
ESI mode	m/z*	RT	cBc1	cBc2	cBc3	cBc4	cBc5	cBt1	cBt2	cBt3	cBt4	cBt5	mBc1	mBc2	mBc3	mBt1	mBt2	mBt3	Med1	Med2	Med3	Mean cBc	Mean cBt	SD cBc	SD cBt	P value
positive	535.185	17.6	0	0	0	0	0	2899.9	3300.1	13443.8	3419.1	3257.2	0	0	0	167.6	0	0	0	0	0	0	5264.02	0	4576.73	0.016516
positive	535.185	18.4	0	0	0	0	0	12247	4008.7	12266.4	4731.2	2632.9	0	0	0	534.7	249.8	541.9	0	0	0	0	7177.24	0	4697.76	0.00456909
positive	267.592	17.6	0	0	0	0	0	13913.4	10240.5	48267.4	13724.1	11791.7	0	0	0	1884.9	104.5	176.7	0	0	0	0	19587.4	0	16103.2	0.0131268
positive	267.592	18.4	0	0	0	0	59.4	13256.6	6081.4	19918	6001.6	4457	0	0	0	1998.8	1025	1727.3	0	0	0	11.88	9942.92	26.5645	6538.79	0.00470742
positive	276.598	18.5	5100	0	0	0	0	39443.3	28690	66159	26587.2	18058.6	0	0	0	677	646.4	628.8	0	0	0	1020	35787.6	2280.79	18608.6	0.00161168
positive	553.195	18.5	0	0	0	0	0	25410.2	11472.4	24912	10580	7100	0	0	0	122.7	118.3	129.7	0	0	0	0	15894.9	0	8616.93	0.00166134
positive	429.158	19.5	0	0	0	0	0	224	0	330.5	0	0	0	0	0	0	0	0	0	0	0	0	110.9	0	156.455	0.0758136
positive	429.158	21.5	0	0	0	0	0	276	436.2	1165.6	732.5	196.5	0	0	0	0	0	0	0	0	0	0	561.36	0	395.162	0.00653292
positive	214.579	19.5	0	0	0	0	0	612.4	525.4	894.9	697.8	332.2	0	0	0	0	0	0	0	0	0	0	612.54	0	208.075	8.62412e-05
positive	214.579	21.5	140.5	95.7	222.2	100.3	108.8	2463.6	3015.5	8043.3	3375.1	1810.5	0	0	0	248.9	237	234.6	0	0	0	133.5	3741.6	52.5782	2476.32	0.00578687
positive	316.463	28	0	0	220.2	0	0	1691.4	1471.6	2090.7	2677.9	1866.3	0	0	0	0	0	0	0	0	0	44.04	1959.58	98.4764	461.498	8.70343e-06
positive	356.803	29.9	0	0	0	0	0	332.9	428.4	704.8	416.6	460.6	0	0	0	0	0	0	0	0	0	0	468.66	0	140.169	3.54227e-05
positive	220.777	34.5	0	0	0	0	0	268.8	673.7	329.1	0	1258.2	0	0	0	0	0	0	0	0	0	0	505.96	0	484.128	0.0238228
Raw data Bzn 50 µM
ESI mode	m/z*	RT	cBc3	cBc4	cBc5	cBt3	cBt4	cBt5	Mean cBc	Mean cBt	SD cBc	SD cBt	P value
positive	206.117	12.5	7369	0	0	288417	245603	895893	2456.33	476638	4254.49	363716	0.043439
positive	246.112	13.5	0	0	0	74841.1	74107.8	188661	0	112537	0	65926.5	0.0208473
positive	264.122	13.5	0	4138.1	5769.7	2.68647e+06	2436734	7448296	3302.6	4.1905e+06	2974.21	2.8241e+06	0.0310532
positive	164.095	13.6	0	977.9	1595.2	41106.5	34380	124335	857.7	66607.2	804.364	50106.8	0.0427465
positive	239.082	18.3	0	0	0	15717.1	10928.2	31012.7	0	19219.3	0	10490.3	0.0168754
positive	478.163	18.3	0	0	0	2374.5	1572.7	8641.8	593.625	4196.33	1187.25	3870.7	0.0668132
positive	429.158	19.6	0	0	0	727.4	385.3	990.8	0	701.167	0	303.601	0.00806391
positive	214.579	19.7	0	0	0	3896.4	2321.5	2763.7	0	2993.87	0	812.287	0.00154484
positive	322.467	30	0	163.6	458.3	29001	21663.9	18834	207.3	23166.3	232.254	5247.37	0.000815899
positive	483.7	30	0	0	0	2471.7	2622.2	2703.8	0	2599.23	0	117.742	1.39716e-06
positive	418.825	30.2	0	0	0	6374.2	3517.7	3906.5	0	4599.47	0	1549.21	0.00339022
positive	393.169	32.4	0	0	0	3858.4	1573.9	3662.5	0	3031.6	0	1266.2	0.00714772
positive	331.166	34.5	0	0	0	1884.1	0	1451.9	0	1112	0	986.969	0.0613749
positive	220.777	34.5	0	0	0	1488.7	2615.2	2593.8	0	2232.57	0	644.296	0.00193917
